# Supplementary material
Source: publisher figshare collection journal article supplement (https://sage.figshare.com/ndownloader/files/21891558)
Supplement: Supplementary file 1 [file 21891558]

* Encoding: UTF-8.


*Use file: N70_SimulatedData_For Kappa vs ICC.sav 

**Calculation of Kappa matrix.
CROSSTABS 
  /TABLES=Obs1_num BY Obs2_num 
  /FORMAT=AVALUE TABLES 
  /STATISTICS=KAPPA 
  /CELLS=COUNT 
  /COUNT ROUND CELL.

**Calculation of summary measure for each code (and each observer) using the 2.5 min segments.
DATASET ACTIVATE DataSet3.
DATASET DECLARE N7_CountMeasures.
AGGREGATE
  /OUTFILE='N7_CountMeasures'
  /BREAK=Intervall
  /Obs1_num_A_sum=SUM(Obs1_num_A) 
  /Obs1_num_B_sum=SUM(Obs1_num_B) 
  /Obs1_num_C_sum=SUM(Obs1_num_C) 
  /Obs1_num_D_sum=SUM(Obs1_num_D) 
  /Obs2_num_A_sum=SUM(Obs2_num_A) 
  /Obs2_num_B_sum=SUM(Obs2_num_B) 
  /Obs2_num_C_sum=SUM(Obs2_num_C) 
  /Obs2_num_D_sum=SUM(Obs2_num_D).


**Calculation of code-specific ICCs.
 
DATASET ACTIVATE N7_CountMeasures.
RELIABILITY
  /VARIABLES=Obs1_num_A_sum Obs2_num_A_sum
  /SCALE('ALL VARIABLES') ALL
  /MODEL=ALPHA
  /ICC=MODEL(MIXED) TYPE(ABSOLUTE) CIN=95 TESTVAL=0.

DATASET ACTIVATE N7_CountMeasures.
RELIABILITY
  /VARIABLES=Obs1_num_B_sum Obs2_num_B_sum
  /SCALE('ALL VARIABLES') ALL
  /MODEL=ALPHA
  /ICC=MODEL(MIXED) TYPE(ABSOLUTE) CIN=95 TESTVAL=0.

DATASET ACTIVATE N7_CountMeasures.
RELIABILITY
  /VARIABLES=Obs1_num_C_sum Obs2_num_C_sum
  /SCALE('ALL VARIABLES') ALL
  /MODEL=ALPHA
  /ICC=MODEL(MIXED) TYPE(ABSOLUTE) CIN=95 TESTVAL=0.

DATASET ACTIVATE N7_CountMeasures.
RELIABILITY
  /VARIABLES=Obs1_num_D_sum Obs2_num_D_sum
  /SCALE('ALL VARIABLES') ALL
  /MODEL=ALPHA
  /ICC=MODEL(MIXED) TYPE(ABSOLUTE) CIN=95 TESTVAL=0.
